# Supplementary material
Source: Preprints.org preprint supplement (doi:10.20944/preprints201909.0258.v1)

## 多样性测序样品质检报告

## 一、项目基本信息

|       |                                                |        |               |
|-------|------------------------------------------------|--------|---------------|
| 项目名称  | MJ20171016007-MJ-M-20171022014-蔚薇-20171026质检报告 | 项目跟进销售 | 曹维            |
| 项目联系人 | 蔚薇                                             | 合同编号   | MJ20171016007 |
| 收样人   | 程红                                             | 收样日期   | 2017-10-17    |
| 质检人   | 汪雅                                             | 报告日期   | 2017-10-26    |
| 报告撰写人 | 汪雅                                             | 报告审核人  | 李小刚           |

## 二、样品检测方法

DNA纯度检测方法: NanoDrop2000

DNA浓度检测方法: NanoDrop2000

DNA完整性检测方法: 琼脂糖凝胶电泳

## 三、样品检测结果

| 胶图编号 | 美吉编号      | 样品名称          | 送样形式 | 浓度 (ng/μl) | OD260/280 | OD260/230 |
|------|-----------|---------------|------|------------|-----------|-----------|
| 1    | EBJ230037 | J_T_YS_1_w    | 土壤   | 36.60      | 1.96      | 0.14      |
| 2    | EBJ230038 | J_T_YS_2_w    | 土壤   | 27.00      | 1.96      | 0.10      |
| 3    | EBJ230039 | J_T_YS_3_w    | 土壤   | 26.50      | 1.95      | 0.11      |
| 4    | EBJ230040 | J_T_JJE_1_w   | 土壤   | 12.70      | 2.18      | 0.05      |
| 5    | EBJ230041 | J_T_JJE_2_w   | 土壤   | 15.30      | 1.97      | 0.10      |
| 6    | EBJ230042 | J_T_JJE_3_w   | 土壤   | 13.90      | 2.24      | 0.03      |
| 7    | EBJ230043 | J_T_SJ_1_w    | 土壤   | 10.90      | 2.07      | 0.03      |
| 8    | EBJ230044 | J_T_SJ_2_w    | 土壤   | 9.50       | 1.89      | 0.07      |
| 9    | EBJ230045 | J_T_SJ_3_w    | 土壤   | 4.90       | 2.08      | 0.05      |
| 10   | EBJ230046 | J_T_YOUS_1_w  | 土壤   | 4.40       | 2.10      | 0.09      |
| 11   | EBJ230047 | J_T_YOUS_2_w  | 土壤   | 11.70      | 1.62      | 0.09      |
| 12   | EBJ230048 | J_T_YOUS_3_w  | 土壤   | 12.30      | 1.99      | 0.06      |
| 13   | EBJ230049 | J_T_YWOZ_1_w  | 土壤   | 4.90       | 2.32      | 0.04      |
| 14   | EBJ230050 | J_T_YWOZ_2_w  | 土壤   | 3.90       | 2.09      | 0.04      |
| 15   | EBJ230051 | J_T_YWOZ_3_w  | 土壤   | 5.50       | 1.91      | 0.03      |
| 16   | EBJ230052 | J_T_SX_1_w    | 土壤   | 6.60       | 2.44      | 0.06      |
| 17   | EBJ230053 | J_T_SX_2_w    | 土壤   | 7.90       | 2.15      | 0.08      |
| 18   | EBJ230054 | J_T_SX_3_w    | 土壤   | 19.60      | 2.05      | 0.05      |
| 19   | EBJ230055 | J_T_CB_1_w    | 土壤   | 4.40       | 2.18      | 0.03      |
| 20   | EBJ230056 | J_T_CB_2_w    | 土壤   | 5.60       | 2.02      | 0.05      |
| 21   | EBJ230057 | J_T_CB_3_w    | 土壤   | 4.80       | 2.23      | 0.01      |
| 22   | EBJ230058 | J_T_WHLS_1_w  | 土壤   | 16.20      | 1.84      | 0.09      |
| 23   | EBJ230059 | J_T_WHLS_2_w  | 土壤   | 14.20      | 1.92      | 0.13      |
| 24   | EBJ230060 | J_T_WHLS_3_w  | 土壤   | 21.90      | 1.90      | 0.05      |
| 25   | EBJ230061 | J_T_WHJJE_1_w | 土壤   | 14.60      | 1.88      | 0.57      |
| 26   | EBJ230062 | J_T_WHJJE_2_w | 土壤   | 16.20      | 1.98      | 0.41      |

|     |           |               |    |       |      |      |
|-----|-----------|---------------|----|-------|------|------|
| 27  | EBJ230063 | J_T_WHJJE_3_w | 土壤 | 16.70 | 2.01 | 0.32 |
| 28  | EBJ230064 | T_ZR_1_w      | 土壤 | 23.40 | 1.95 | 0.20 |
| 29  | EBJ230065 | T_ZR_2_w      | 土壤 | 17.60 | 1.94 | 0.45 |
| 30  | EBJ230066 | T_ZR_3_w      | 土壤 | 24.10 | 1.83 | 0.15 |
| 31  | EBJ230067 | T_YS_1_w      | 土壤 | 20.60 | 1.79 | 0.13 |
| 32  | EBJ230068 | T_YS_2_w      | 土壤 | 15.60 | 1.88 | 0.28 |
| 33  | EBJ230069 | T_YS_3_w      | 土壤 | 20.10 | 1.90 | 0.24 |
| 34  | EBJ230070 | T_JJESJ_1_w   | 土壤 | 64.80 | 1.57 | 0.57 |
| 35  | EBJ230071 | T_JJESJ_2_w   | 土壤 | 13.80 | 2.04 | 0.09 |
| 36  | EBJ230072 | T_JJESJ_3_w   | 土壤 | 8.20  | 2.19 | 0.12 |
| 37  | EBJ230073 | T_YOUS_1_w    | 土壤 | 19.20 | 2.01 | 0.10 |
| 38  | EBJ230074 | T_YOUS_2_w    | 土壤 | 11.10 | 1.86 | 0.30 |
| 39  | EBJ230075 | T_YOUS_3_w    | 土壤 | 11.10 | 1.93 | 0.25 |
| 40  | EBJ230076 | T_SX_1_w      | 土壤 | 16.50 | 1.99 | 0.11 |
| 41  | EBJ230077 | T_SX_2_w      | 土壤 | 13.70 | 1.80 | 0.21 |
| 42  | EBJ230078 | T_SX_3_w      | 土壤 | 14.80 | 1.92 | 0.10 |
| 43  | EBJ230079 | T_CBWH_1_w    | 土壤 | 21.50 | 1.91 | 0.16 |
| 44  | EBJ230080 | T_CBWH_2_w    | 土壤 | 15.10 | 1.93 | 0.12 |
| 45  | EBJ230081 | T_CBWH_3_w    | 土壤 | 9.60  | 2.23 | 0.07 |
| 46  | EBJ230082 | T_WW_1_w      | 土壤 | 10.60 | 1.84 | 0.11 |
| 47  | EBJ230083 | T_WW_2_w      | 土壤 | 15.40 | 2.04 | 0.13 |
| 48  | EBJ230084 | T_WW_3_w      | 土壤 | 5.80  | 2.36 | 0.14 |
| 备注: |           |               |    |       |      |      |

声明:本报告只对本次检测样品负责

四、附件

附件一：琼脂糖凝胶电泳检测结果

（1）检测前准备

将样品在冰上融化后，充分混匀并离心，取适量样品进行检测。

（2）检测参数

琼脂糖凝胶浓度：1% 琼脂糖胶

电压：5 V/cm

时间：20min

（3）电泳检测图：

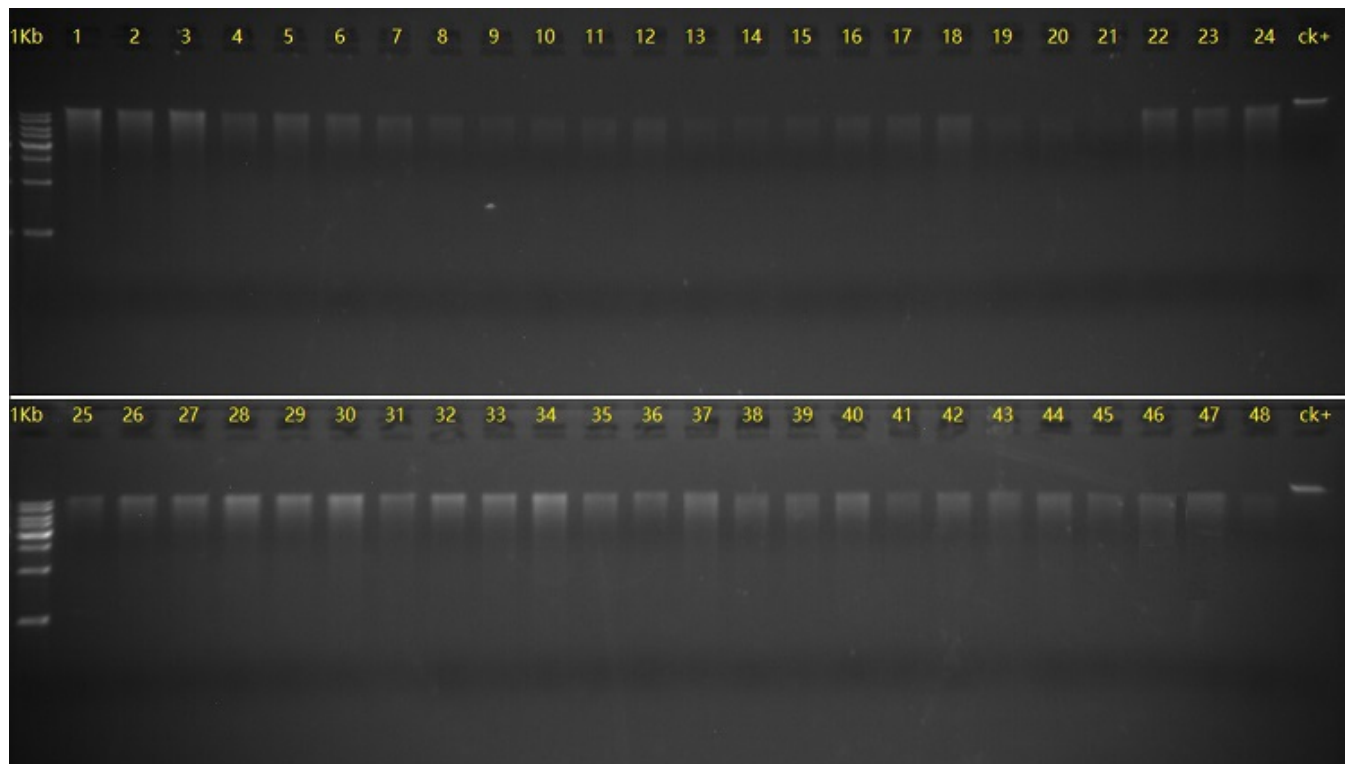

Ladder条带分布图:

1Kb Ladder

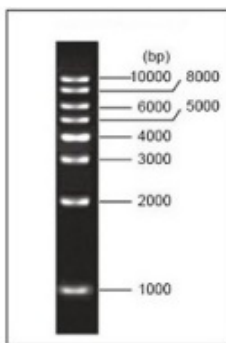

Supplement: Supplementary file 3 [file supplementary]
