# Supplementary material
Source: Preprints.org preprint supplement (doi:10.20944/preprints201909.0258.v1)
Supplement: Supplementary file 2 [file supplementary]

# 美吉生物PCR扩增报告

## 1. 项目基本信息

|        |                                                     |         |               |
|--------|-----------------------------------------------------|---------|---------------|
| 项目名称   | MJ20171016007-MJ-M-20171116034-蔚薇-20171124PCR正式实验报告 | 项目跟进销售  | 曹维            |
| 项目联系人  | 蔚薇                                                  | 合同编号    | MJ20171016007 |
| 收样人    | 赵利娜                                                 | 收样日期    | 2017-11-16    |
| PCR操作员 | 宋佳宇                                                 | PCR报告日期 | 2017-11-24    |
| 报告撰写人  | 宋佳宇                                                 | 报告审核人   | 张璐璐           |

## 2. PCR预实验

### 2.1 引物设计

| 测序区域        | 引物名称  | 引物序列                   | 备注 |
|-------------|-------|------------------------|----|
| ITS1F_ITS2R | ITS1F | CTTGGTCATTTAGAGGAAGTAA |    |
|             | ITS2R | GCTGCGTTCTTCATCGATGC   |    |

### 2.2 PCR扩增条件

为了保证后续数据分析的准确性及可靠性，需要两个条件，首先是尽可能使用低循环数扩增；其次保证每个样品扩增的循环数统一。为了达到以上目的，我方首先随机选取样品进行预实验，以确保在最低的循环数中绝大多数的样品能够扩增出浓度合适的产物，为所有样品的正式试验做充分准备。

在预实验完成后，PCR 正式试验采用TransGen AP221-02: TransStart Fastpfu DNA Polymerase，20μl反应体系：

5×FastPfu Buffer ..... 4 μl  
 2.5 mM dNTPs ..... 2 μl  
 Forward Primer(5 μM) ..... 0.8 μl  
 Reverse Primer(5 μM) ..... 0.8 μl  
 FastPfu Polymerase ..... 0.4 μl  
 BSA ..... 0.2 μl  
 Template DNA ..... 10 ng

补ddH<sub>2</sub>O至 ..... 20 μl

PCR仪：ABI GeneAmp® 9700型

PCR反应参数：

- 1× (3 minutes at 95°C)
- 循环数 × (30 seconds at 95°C; 30 seconds at 退火温度 °C; 45 seconds at 72°C)
- 10 minutes at 72°C, 10°C until halted by user

### 2.3 PCR扩增结果鉴定胶图

2%琼脂糖凝胶电泳检测PCR产物，3μl上样检测电泳图：

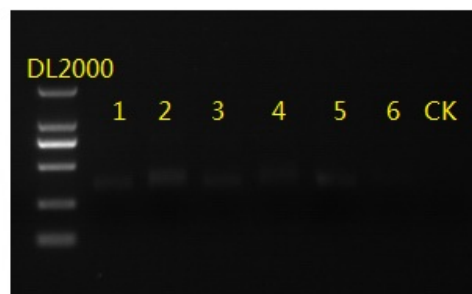

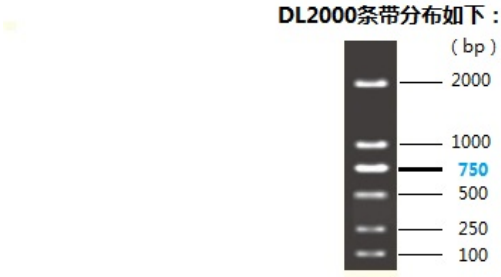

2.4 PCR扩增结果

我方已将贵方样品进行PCR扩增条件摸索，截止目前的PCR扩增结果统计如下：

| 胶图编号 | 样品名称        | 美吉编号      | 实验名称   | 测序引物        | 退火温度(℃) | 循环数 | 结果 |
|------|-------------|-----------|--------|-------------|---------|-----|----|
| 1    | T_JJESJ_3_w | EBK170147 | 蔚薇A145 | ITS1F ITS2R | 55      | 35  | A  |
| 2    | T_YOUS_2_w  | EBK170148 | 蔚薇A146 | ITS1F ITS2R | 55      | 35  | A  |
| 3    | T_SX_1_w    | EBK170149 | 蔚薇A147 | ITS1F ITS2R | 55      | 35  | A  |
| 4    | T_SX_2_w    | EBK170150 | 蔚薇A148 | ITS1F ITS2R | 55      | 35  | A  |
| 5    | T_WW_2_w    | EBK170155 | 蔚薇A149 | ITS1F ITS2R | 55      | 35  | A  |
| 6    | T_WW_3_w    | EBK170156 | 蔚薇A150 | ITS1F ITS2R | 55      | 35  | B  |

2.5 结果说明

| 结果代码 | 预实验结果说明                             |
|------|-------------------------------------|
| A    | PCR产物目的条带大小正确，浓度合适，可进行后续实验；         |
| B    | PCR产物目的条带大小正确，浓度偏低，可尝试进行后续实验；       |
| C    | PCR产物目的条带太弱或未检测到，无法进行后续实验，需要重新提供样品； |
