# Supplementary material
Source: Preprints.org preprint supplement (doi:10.20944/preprints201909.0258.v1)
Supplement: Supplementary file 3 [file Diversity.xlsx]

## Sheet: bacterial
Number	sobs	shannon	simpson	ace	chao	coverage
R1	2477	6.5915	0.003195	3335.83	3315.64	0.971549
R1	2440	6.54162	0.003425	3267.81	3351.84	0.971762
R1	2502	6.62379	0.003065	3327.13	3289	0.972046
R2	2624	6.68138	0.003542	3346.06	3330.9	0.972613
R2	2606	6.73864	0.003301	3172.26	3144.22	0.975735
R2	2637	6.74445	0.00326	3266.17	3241.45	0.974316
R3	2396	6.58014	0.003289	2995.95	3042.49	0.975948
R3	2513	6.62596	0.00335	3235.55	3272.01	0.973146
R3	2469	6.65248	0.003248	3051.85	3002.92	0.976338
R4	2925	6.93298	0.002119	3730.96	3792.01	0.969137
R4	2831	6.86463	0.002256	3682.27	3692.06	0.969172
R4	2896	6.93326	0.002073	3656.12	3704.68	0.969988
R5	2948	6.76785	0.003341	3936.09	3849.95	0.966157
R5	3010	6.85313	0.002672	3997.13	3917.15	0.965625
R5	2931	6.85405	0.002544	3830.13	3819.04	0.967399
R6	2746	6.71915	0.003356	3592.73	3567.8	0.969917
R6	2738	6.73743	0.003064	3565.45	3525.05	0.970059
R6	2661	6.64401	0.003595	3485.03	3506.13	0.970379
CK	2182	6.38217	0.004006	2879.71	2833.86	0.976019
CK	2132	6.33695	0.004388	2817.56	2841.22	0.976232
CK	2215	6.38995	0.003907	2921.97	3000.06	0.974955

## Sheet: fungi
Number	#Sample	sobs	shannon	simpson	ace	chao	coverage
R1	J-T-YS-1-w	466	3.69564	0.059631	583.85	587.052	0.997137
R1	J-T-YS-2-w	334	3.16947	0.109244	401.978	413.026	0.998124
R1	J-T-YS-3-w	359	3.37921	0.07304	462.188	456.133	0.997739
R2	J-T-JJE-1-w	453	3.30443	0.10958	558.253	572.396	0.997281
R2	J-T-JJE-2-w	450	2.44774	0.34719	555.473	557.254	0.997281
R2	J-T-JJE-3-w	562	4.22731	0.044746	668.829	677.161	0.997113
R3	J-T-SJ-1-w	303	3.18979	0.089147	355.313	347.25	0.998557
R3	J-T-SJ-2-w	309	3.08777	0.118871	351.755	356.528	0.998581
R3	J-T-SJ-3-w	274	3.42333	0.068057	302.86	291.333	0.999038
R4	J-T-YOUS-1-w	441	4.22992	0.033492	470.256	469.122	0.998725
R4	J-T-YOUS-2-w	418	4.00138	0.041702	485.503	484.978	0.998099
R4	J-T-YOUS-3-w	474	4.2989	0.028252	516.167	509.75	0.998412
R5	J-T-YWOZ-1-w	460	2.05503	0.449248	520.138	527.685	0.997931
R5	J-T-YWOZ-2-w	389	2.53146	0.190712	485.154	471.727	0.997474
R5	J-T-YWOZ-3-w	536	3.96448	0.050637	590.497	607.667	0.997931
R6	J-T-SX-1-w	481	3.9409	0.069795	526.609	527.473	0.998268
R6	J-T-SX-2-w	440	3.74113	0.058902	498.812	491.803	0.998075
R6	J-T-SX-3-w	438	3.48616	0.104933	535.772	543.06	0.997522
CK	T-ZR-1-w	229	2.50602	0.19689	306.493	302.484	0.998364
CK	T-ZR-2-w	240	2.76015	0.173298	293.764	287.7	0.998701
CK	T-ZR-3-w	297	2.94964	0.159029	358.592	344.043	0.998388
