# Supplementary material
Source: Preprints.org preprint supplement (doi:10.20944/preprints201909.0258.v1)

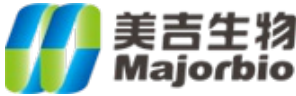

多样性测序样品质检报告

一、项目基本信息

|       |                                                |        |               |
|-------|------------------------------------------------|--------|---------------|
| 项目名称  | MJ20171016007-MJ-M-20171116034-蔚薇-20171121质检报告 | 项目跟进销售 | 曹维            |
| 项目联系人 | 蔚薇                                             | 合同编号   | MJ20171016007 |
| 收样人   | 赵利娜                                            | 收样日期   | 2017-11-16    |
| 质检人   | 汪雅                                             | 报告日期   | 2017-11-21    |
| 报告撰写人 | 汪雅                                             | 报告审核人  | 李小刚           |

二、样品检测方法

DNA纯度检测方法: NanoDrop2000  
DNA浓度检测方法: NanoDrop2000  
DNA完整性检测方法: 琼脂糖凝胶电泳

三、样品检测结果

| 胶图编号 | 美吉编号      | 样品名称        | 送样形式 | 浓度 (ng/ul) | OD260/280 | OD260/230 |
|------|-----------|-------------|------|------------|-----------|-----------|
| 1    | EBK170147 | T_JJESJ_3_w | 土壤   | 17.80      | 2.20      | 0.03      |
| 2    | EBK170148 | T_YOUS_2_w  | 土壤   | 17.10      | 1.83      | 0.08      |
| 3    | EBK170149 | T_SX__1_w   | 土壤   | 12.70      | 1.92      | 0.04      |
| 4    | EBK170150 | T_SX_2_w    | 土壤   | 13.80      | 1.89      | 0.03      |
| 5    | EBK170155 | T_WW_2_w    | 土壤   | 11.60      | 1.80      | 0.09      |
| 6    | EBK170156 | T_WW_3_w    | 土壤   | 11.20      | 1.80      | 0.04      |
| 备注:  |           |             |      |            |           |           |

声明:本报告只对本次检测样品负责

四、附件

附件一：琼脂糖凝胶电泳检测结果

- (1) 检测前准备
- 将样品在冰上融化后，充分混匀并离心，取适量样品进行检测。
- (2) 检测参数
- 琼脂糖凝胶浓度: 1% 琼脂糖胶
- 电压: 5 V/cm
- 时间: 20min
- (3) 电泳检测图:

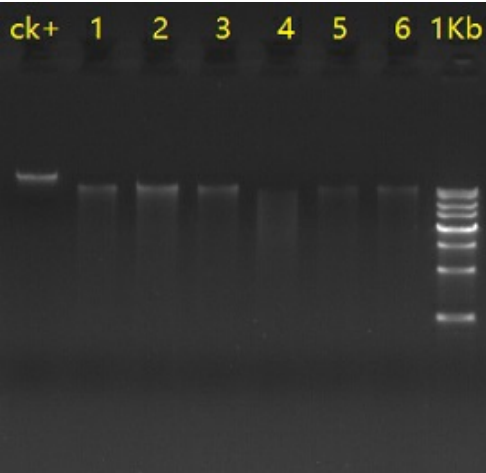

Ladder条带分布图:

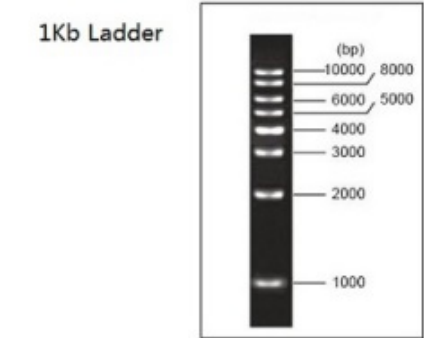

Supplement: Supplementary file 4 [file supplementary]
